# Supplementary material
Source: MDPI journal article supplement (https://www.mdpi.com/1424-2818/11/9/154)
Supplement: s1 [file s1]

**Table S1.** List of common bean germplasm analysed, sample codes, seed features, product type, and phaseolin pattern.

| Number | Working Acc. number | Collection location (Italian region) | Common name                  | Seed shape  | Seed colour (pattern color) | Seed coat pattern |
|--------|---------------------|--------------------------------------|------------------------------|-------------|-----------------------------|-------------------|
| 1      | PH9802              | Gravina (Apulia)                     | Fagiolino                    | oval        | whitish                     | absent            |
| 2      | PH9803              | Nardò (Apulia)                       | Fagiolo da cucina            | kidney      | white                       | absent            |
| 3      | PH5203              | Castrignano (Apulia)                 | Fagioli napoletani           | kidney      | whitish                     | absent            |
| 4      | PH8205              | Supersano (Apulia)                   | Cannellini napoletani        | kidney      | white                       | absent            |
| 5      | PH9                 | Ascoli Satriano (Apulia)             | Tondino                      | oval        | white                       | absent            |
| 6      | PH3                 | Faeto (Apulia)                       | Faeto                        | oval        | whitish                     | absent            |
| 7      | PH18                | Gradoli (Latium)                     | Gradoli                      | oval        | whitish                     | absent            |
| 8      | PH22                | Pettineo (Sicily)                    | Carrubara                    | kidney      | black                       | absent            |
| 9      | PH8601              | Deliceto (Apulia)                    | Fagiuline                    | kidney      | light brown (brown)         | mottled           |
| 10     | PH5106              | Putignano (Apulia)                   | Fafodde                      | oval/cuboid | whitish                     | absent            |
| 11     | PH3106              | Polignano (Apulia)                   | Cannellino                   | cuboid      | white                       | absent            |
| 12     | PH8003              | Nardò (Apulia)                       | Fagiolo napoletano           | kidney      | white                       | absent            |
| 13     | PH0303              | Torre Guaceto (Apulia)               | Fasule                       | kidney      | white                       | absent            |
| 14     | PH7210              | Alezio (Apulia)                      | Fagioli paesani              | cuboid      | white                       | absent            |
| 15     | PH044               | Monteleone (Apulia)                  | Monti Dauni                  | oval        | whitish                     | absent            |
| 16     | PH046               | Panni (Apulia)                       | Mangiatutto                  | oval        | whitish                     | absent            |
| 17     | PH4602              | Altamura (Apulia)                    | Piattella                    | kidney      | white                       | absent            |
| 18     | PH20                | Baragiano (Basilicata)               | Corno di capra               | kidney      | pale brown (maroon)         | striped           |
| 19     | PH4                 | Pratomagno (Tuscany)                 | Zolfino                      | oval        | pale yellow                 | absent            |
| 20     | PH24                | Accettura (Basilicata)               | Locale di Accettura          | kidney      | dark brown                  | absent            |
| 21     | PH26                | market variety                       | Mangiatutto Sx015            | cylindrical | white                       | absent            |
| 22     | PH27                | market variety                       | Mangiatutto Mx200            | cylindrical | cream (brown)               | speckled          |
| 23     | PH28                | market variety                       | Saporro                      | cylindrical | white                       | absent            |
| 24     | PH047               | Anzano (Apulia)                      | Mangiatutto                  | cylindrical | cream                       | absent            |
| 25     | PH17                | Saluggia (Piedmont)                  | Saluggia                     | kidney      | beige (red)                 | striped           |
| 26     | PH25                | Scicli (Sicily)                      | Cosaruciaru                  | kidney      | whitish (brown)             | around hilum      |
| 27     | PH33                | market variety                       | Marconi nero (Starozagorski) | oval        | black                       | absent            |
| 28     | PH8                 | market variety                       | Cannellino                   | cylindrical | whitish                     | absent            |

|    |        |                                |                         |             |                            |                    |
|----|--------|--------------------------------|-------------------------|-------------|----------------------------|--------------------|
| 29 | PH2    | Villata<br>(Piedmont)          | Villata                 | cylindrical | brown (maroon)             | striped            |
| 30 | PH5    | Sarconi<br>(Basilicata)        | Verdolino               | oval        | yellow (brown)             | around hilum       |
| 31 | PH11   | Sarconi<br>(Basilicata)        | Ciuoto                  | oval        | light brown (red)          | striped            |
| 32 | PH12   | Sarconi<br>(Basilicata)        | Tabacchino              | oval        | brown                      | absent             |
| 33 | PH10   | Sarconi<br>(Basilicata)        | Riso                    | round       | whitish                    | absent             |
| 34 | PH1    | Cuneo<br>(Piedmont)            | Billò                   | cuboid      | brown (maroon)             | striped            |
| 35 | PH13   | Polizzi<br>(Sicily)            | Badda nero              | oval        | white (black)              | bicolor            |
| 36 | PH2201 | Fasano<br>(Apulia)             | Fasule                  | oval/cuboid | pale yellow                | absent             |
| 37 | PH4603 | Altamura<br>(Apulia)           | Ciammarruccoli          | oval/cuboid | beige (brown)              | striped            |
| 38 | PH6    | Rotonda<br>(Basilicata)        | Poverello di<br>Rotonda | round       | white                      | absent             |
| 39 | PH16   | Sarconi<br>(Basilicata)        | Nasieddu                | oval        | white (black)              | around hilum       |
| 40 | PH19   | Oppido Mamertino<br>(Calabria) | Vaianelli               | cuboid      | beige (brown)              | mottled            |
| 41 | PH14   | Sarconi<br>(Basilicata)        | Tuvagliedda             | oval        | white (brown)              | striped<br>bicolor |
| 42 | PH29   | Sarconi<br>(Basilicata)        | Tuvagliedda rossa       | oval        | white (maroon)             | spotted<br>bicolor |
| 43 | PH045  | Panni<br>(Apulia)              | Fagiolino rosso         | round       | dark red                   | absent             |
| 44 | PH7    | Castell'Umberto<br>(Sicily)    | Drià                    | oval        | pale brown<br>(brown)      | mottled            |
| 45 | PH31   | Sarconi<br>(Basilicata)        | Maruchedda              | cuboid      | beige (brown)              | striped            |
| 46 | PH15   | Sarconi<br>(Basilicata)        | San Michele             | round/oval  | red                        | absent             |
| 47 | PH32   | Sarconi<br>(Basilicata)        | Riso giallo             | round       | whitish                    | absent             |
| 48 | PH21   | Sinagra<br>(Sicily)            | Monaco                  | oval/cuboid | whitish (mottled<br>brown) | around hilum       |
| 49 | PH30   | Sarconi<br>(Basilicata)        | Munachedda              | oval        | white (black)              | spotted<br>bicolor |
| 50 | PH4606 | Altamura<br>(Apulia)           | Pezzati                 | oval        | white (beige)              | striped<br>bicolor |

| Product type | Phaseolin pattern |
|--------------|-------------------|
| snap bean    | S                 |
| dry bean     | S                 |
| dry bean     | S                 |
| dry bean     | S                 |
| dry bean     | S                 |
| dry bean     | S                 |
| dry bean     | S                 |
| dry bean     | S                 |
| dry bean     | S                 |
| snap bean    | S                 |
| dry bean     | S                 |
| dry bean     | S                 |
| dry bean     | S                 |
| dry bean     | S                 |
| dry bean     | S                 |
| dry bean     | S                 |
| dry bean     | S                 |
| snap bean    | S                 |
| dry bean     | S                 |
| dry bean     | S                 |
| dry bean     | S                 |
| dry bean     | C                 |
| snap bean    | T                 |
| dry bean     | T                 |
| dry bean     | T                 |
| snap bean    | T                 |
| dry bean     | T                 |

|                  |   |
|------------------|---|
| dry bean         | C |
| dry bean         | T |
| dry bean         | T |
| dry bean         | T |
| dry bean         | C |
| dry bean         | C |
| dry bean         | C |
| dry seed         | C |
| dry bean         | C |
| dry bean         | C |
| dry bean         | T |
| dry bean         | C |
| dry bean         | T |
| dry bean         | T |
| snap bean        | C |
| dry bean         | C |
| snap/dry<br>bean | C |
| dry bean         | T |
| snap bean        | T |
| dry bean         | C |
| dry bean         | C |
| dry bean         | T |
