# Supplementary material
Source: MDPI journal article supplement (https://www.mdpi.com/1424-2818/11/9/154)
Supplement: s1 [file s1]

**Fig. S1.** Italian common bean (*Phaseolus vulgaris* L.) landraces used in this study. The letter after the sample name indicates the phaseolin type.

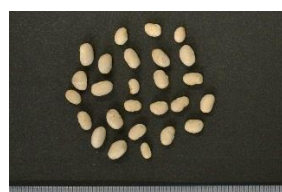

1\_Fagiolino\_S

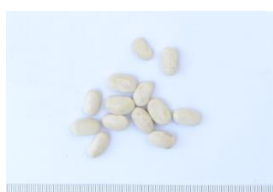

2\_Da-cucina\_S

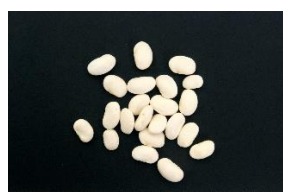

3\_Napoletani\_S

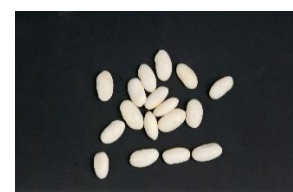

4\_Cannelini-napoletani\_S

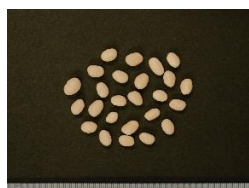

5\_Tondino\_S

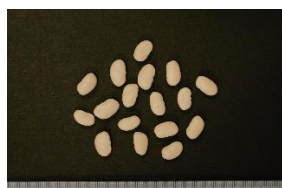

6\_Faeto\_S

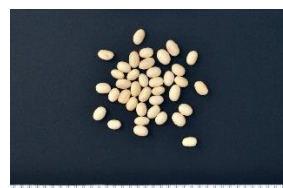

7\_Gradoli\_S

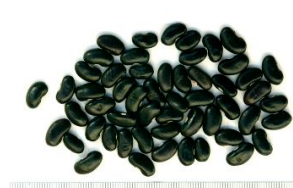

8\_Carrubara\_S

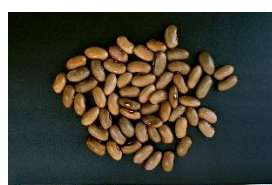

9\_Fagiuline\_S

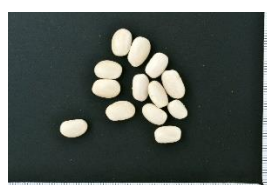

10\_Fafodde\_S

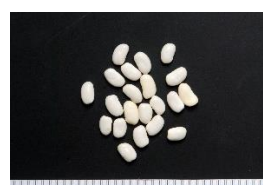

11\_Cannellino\_S

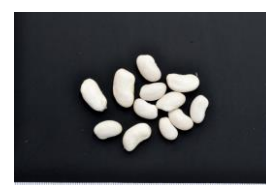

12\_Fagiolo-napoletano\_S

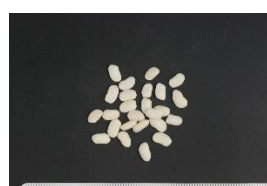

13\_Fasule\_S

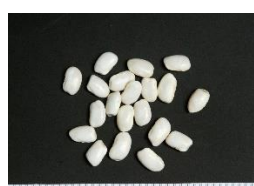

14\_Paesani\_S

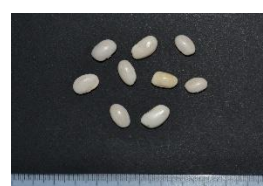

15\_Monti-Dauni\_S

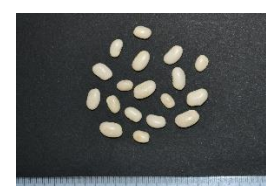

16\_Mangiatutto\_S

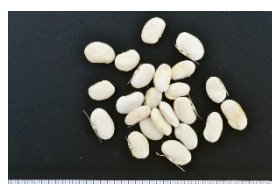

17\_Piattella\_S

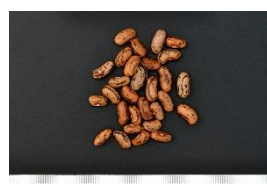

18\_Corno-di-capra\_S

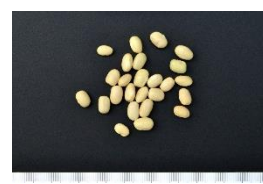

19\_Zolfino\_S

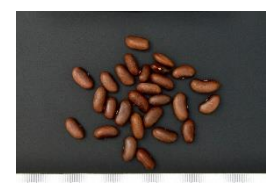

20\_Locale-di-Accettura\_C

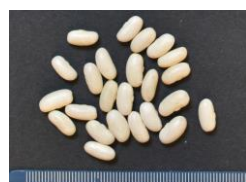

21\_Mangiatutto-Sx015\_T

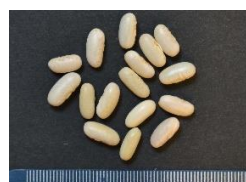

22\_Mangiatutto-Mx200\_T

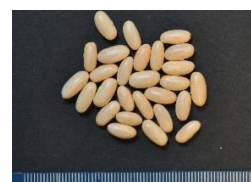

23\_Saporro\_T

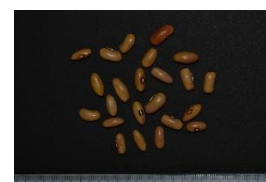

24\_Mangiatutto\_T

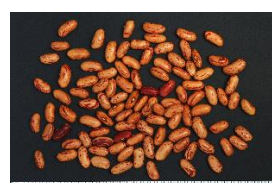

25\_Saluggia\_T

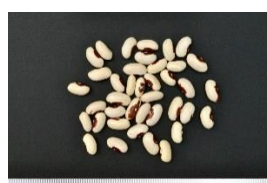

26\_Cosaruciaru\_T

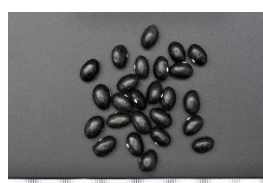

27\_Marconi-nero\_T

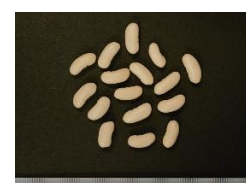

28\_Cannellino\_T

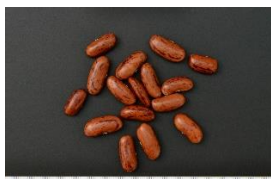

29\_Villata\_C

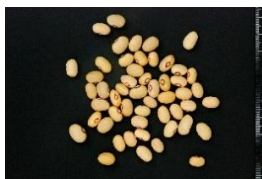

30\_Verdolino\_T

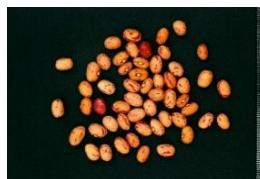

31\_Ciuoto\_T

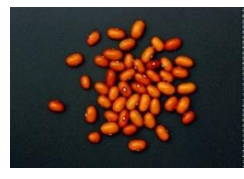

32\_Tabacchino\_T

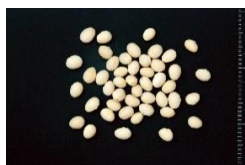

33\_Riso\_C

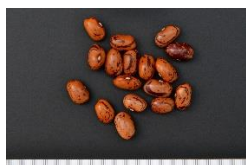

34\_Billò\_C

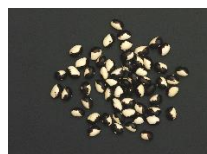

35\_Badda-nero\_C

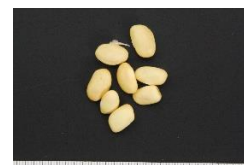

36\_Fasule\_C

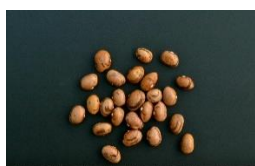

37\_Ciarrarrucoli\_C

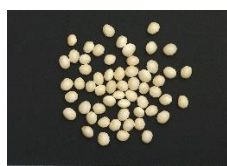

38\_Poverello\_C

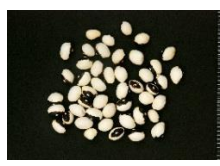

39\_Nasieddu\_T

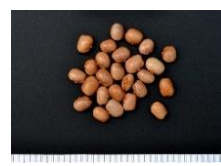

40\_Vaianelli\_C

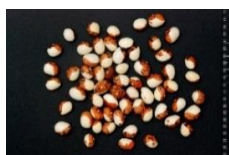

41\_Tuvagliesda\_T

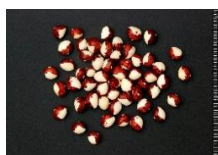

42\_Tuvagliesda-rossa\_T

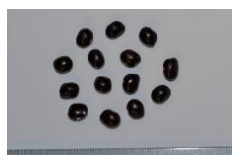

43\_Fagiolino-rosso\_C

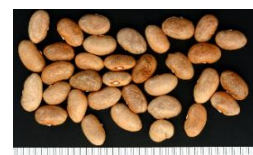

44\_Drià\_C

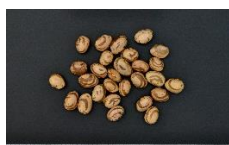

45\_Maruchedda\_C

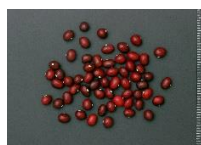

46\_San-Michele\_T

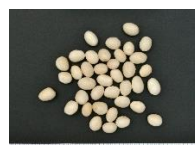

47\_Riso-giallo\_T

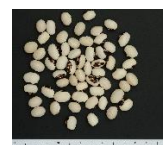

48\_Monaco\_C

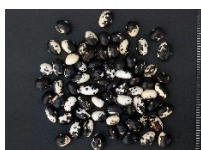

49\_Munachedda\_C

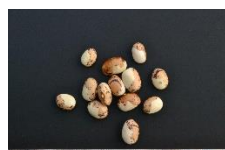

50\_Pezzati\_T
