# Supplementary material
Source: MDPI journal article supplement (https://www.mdpi.com/1424-2818/11/9/154)

Fig. S2. Estimate of the most probable K by means of  $\Delta K$  statistics. The number of subpopulations (K) was ascertained based on maximum likelihood and  $\Delta K$  values.

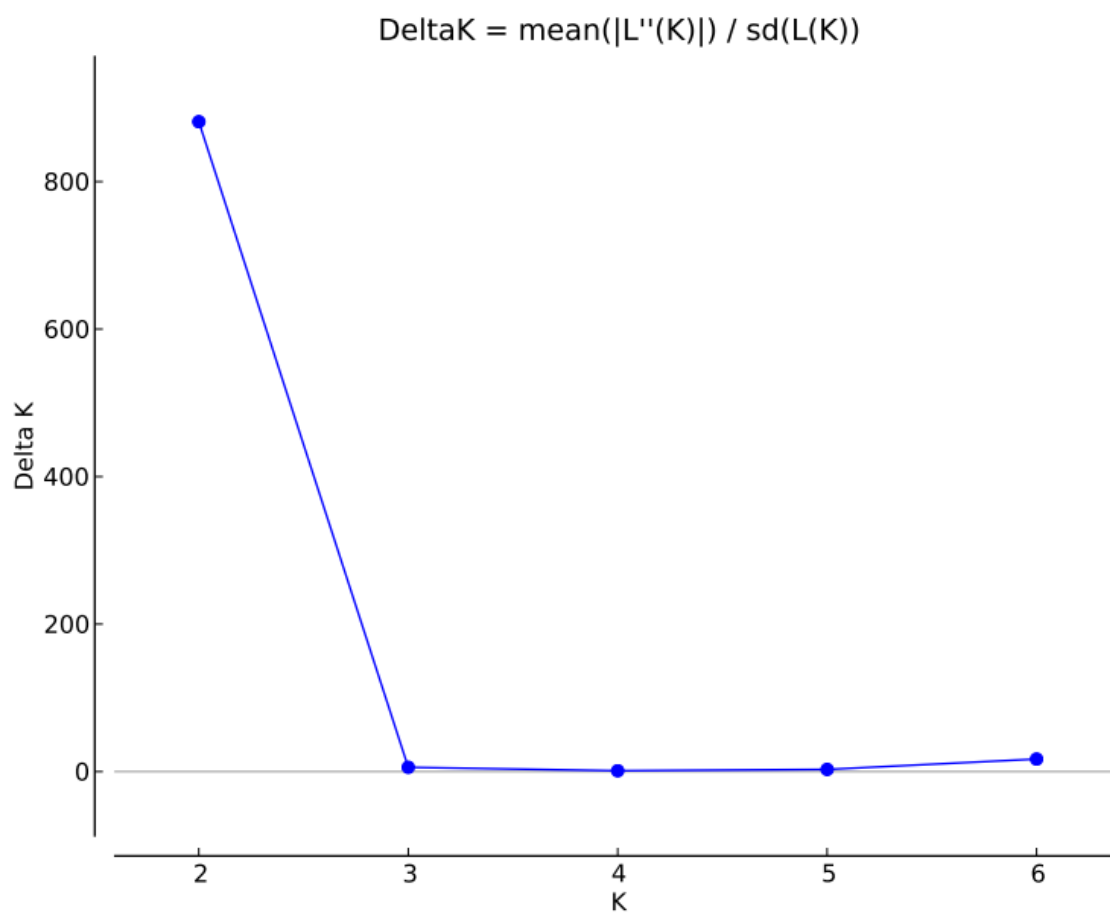

Supplement: s1 [file s1]
